# Supplementary material
Source: MDPI journal article supplement (https://www.mdpi.com/2077-0472/14/2/265)

## Supplementary S1

**Table S1. Used primers in this study:**

| Primer name            | Primer sequences                                       | Working state                  | Comments                       |
|------------------------|--------------------------------------------------------|--------------------------------|--------------------------------|
| 28ff or 25f1           | 5`-GACCCCAGGTCAGGCGGGACTACC-3`                         | OK                             | Universe primers for           |
| 28rr1 or 25r1          | 5`-GCTATCCTGAGGGAAACTTCGGAGG-3`                        | OK                             | amplification of 25S rRNA gene |
| 9con8F2, or 98f2       | 5`-CGCACCGTTCGAACTGTAGTC-3`                            | OK                             | Specificity primer for RC2     |
| 9con8rev2, or 98rev2   | 5`-GTTACAGCGTGGCACCCCAAGG-3`                           | OK                             | Specificity primer for RC2     |
| 9con8F2cy5, or 98f2cy5 | 5`-CGCACCGTTCGAACTGTAGTC-3`                            | OK                             | CY5 labelled for cDNA T-RFLP   |
| 9con8F, or 98f         | 5`-GTGAGCGAACTGGGAGATGCTC-3`                           | X                              |                                |
| 9con8rev, or 98rev     | 5`-CCGGGTTTCAGAGCACATTATCTC-3`                         | X                              |                                |
| 9con8rev3, or 98rev3   | 5`-CGATTGACGTCAGTATTGCTTTG-3`                          | X                              |                                |
| 9con14F, or 914f       | 5`-GCCCAACGTGAAAATCGGGCAG-3`                           | OK                             | Specificity primer for RC3     |
| 9con14rev2, or 914rev2 | 5`-GTATCACTTTGAGCCTCCACC-3`                            | OK                             | Specificity primer for RC3     |
| 9con14rev, or 914rev   | 5`-GGCCAGCGATGCGGCCCATG-3`                             | X                              |                                |
| 9con31f, or 931f       | 5`-CCCTAATAACCGAATTGTAGTCTGG-3`                        | OK                             | Specificity primer for RC1     |
| 9con31rev, or 931rev   | 5`-CTAGATGGTTCGATTGGTCTCATCC-3`                        | OK                             | Specificity primer for RC1     |
| 283fcy5                | 5`-GCA (AG) CCCAAAT (CT) (AG) GG (ACT) G (AG) TAAAC-3` | OK                             | Forward sequencing primer      |
| 367rcy5                | 5`-CTTTCCTC (AG) (CT) GGT (AG) CTGT (CT) (AG) C-3`     | OK                             | Reverse sequencing primer      |
| 406rcy5                | 5`-CA (AC) GCACT (GCT) TTGACTCTTTTC-3`                 | OK                             | Reverse sequencing primer      |
| 887revcy5              | 5`-GCCTCCA (CT) (CT) AGA (GT) TTT (CT) CT (AC) TG-3`   | OK                             | Reverse sequencing primer      |
| 648r                   | 5`-GCGGCGTCTATGGGGTGCCT-3`                             |                                |                                |
| 18S primer             | NS1                                                    | 5`-GTAGTCATATGCTTGTCTC-3`      | Cy5 labelled sequencing primer |
|                        | NS2                                                    | 5`-GGCTGCTGGCACCAGACTTGC-3`    | Cy5 labelled sequencing primer |
|                        | NS3                                                    | 5`-GCAAGTCTGGTGCCAGCAGCC-3`    | Cy5 labelled sequencing primer |
|                        | NS4                                                    | 5`-CTTCCGTCAATTCCTTTAAG-3`     | Cy5 labelled sequencing primer |
|                        | NS5                                                    | 5`-AACTTAAAGGAATTGACGGAAG-3`   | Cy5 labelled sequencing primer |
|                        | NS6                                                    | 5`-GCATCACAGACCTGTTATTGCCTC-3` | Cy5 labelled sequencing primer |
|                        | NS7                                                    | 5`-GAGGCAATAACAGGTCTGTGATGC-3` | Cy5 labelled sequencing primer |
|                        | NS8                                                    | 5`-TCCGCAGGTTACCTACGGA-3`      | Cy5 labelled sequencing primer |
| ITS primer             | ITS1                                                   | 5`-TCCGTAGGTGAACCTGCGG-3`      |                                |
|                        | ITS2                                                   | 5`-GCTGCGTTCTTCATCGATGC-3`     |                                |
|                        | ITS3                                                   | 5`-GCATCGATGAAGAACGCAGC-3`     |                                |
|                        | ITS4                                                   | 5`-TCCTCCGCTTATTGATATGC-3`     |                                |
|                        | ITS5                                                   | 5`-GGAAGTAAAAGTCGTAACAAGG-3`   | Cy5 labelled sequencing primer |

**A**

|              |                                                                            |       |        |       |
|--------------|----------------------------------------------------------------------------|-------|--------|-------|
|              | 48                                                                         | 32    | P-site | 49    |
| Tradescantia | AGCGCGAGTCATCAGCTCGCGTTGACTACGTCCCTGCCCTTTGTACACACCGCCCGTCGCTCCTACCGATTGAA |       |        |       |
| Arabidopsis  | .....                                                                      | ..... | .....  | ..... |
| Acorus       | .....                                                                      | ..... | .....  | ..... |
| Sparganium   | .....                                                                      | ..... | .....  | ..... |
| Zea          | .....                                                                      | ..... | .....  | ..... |
| Triticum     | .....                                                                      | ..... | .....  | ..... |
| Oryza        | .....                                                                      | ..... | .....  | ..... |
| RDF2 Oryza   | .....                                                                      | ..... | .....  | ..... |
|              | 49                                                                         |       |        |       |
| Tradescantia | TGGTCCGGTGAAATGTTCGGATCGCGGCACGGGGCGGTTTCGCCG-----CCCGCGACGTCGC            |       |        |       |
| Arabidopsis  | ..A.....G.....T..T.....                                                    |       |        |       |
| Acorus       | .....G.....A.....                                                          |       |        |       |
| Sparganium   | .....G.....C.....T.....                                                    |       |        |       |
| Zea          | .....G.....G.T...CG.ACC..TTCGC...C-----GA.CGTCCGC.                         |       |        |       |
| Triticum     | .....G.....                                                                |       |        |       |
| Oryza        | .....G.....                                                                |       |        |       |
| RDF2 Oryza   | .....A.....G...T..T..A.....TT.....AATCCTACCGATTGAHTG.TCCA...CA             |       |        |       |

**B**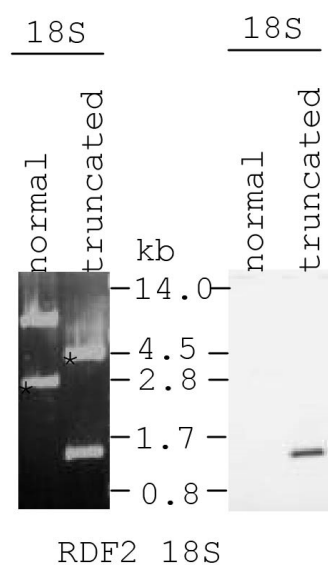**C**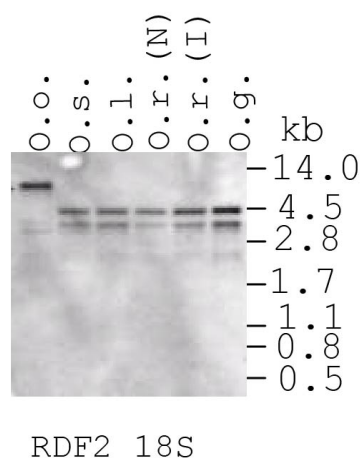**D**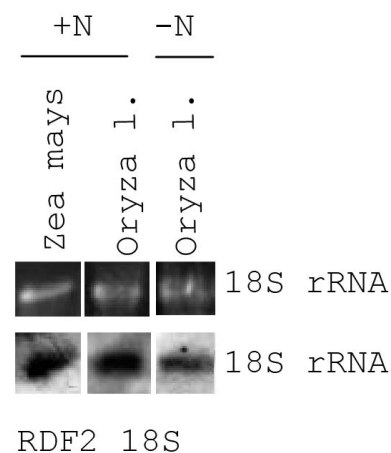

Figure S1. Codominant expression of RDF1-3 in rice. Presence of truncated RDF2 18S in ribosome preparations. (A) The portion of the aligned matrix from a unique truncated *O. officinalis* 18S ribosomal gene linked to RDF2 28S rRNA (AY097331) shows two INDELs in the decoding region that distinguishes it from other 18S rRNA genes. Dots indicate nucleotides identical to the top sequence, and dashes indicate gaps. The deleted and a putative alternative P-site are labeled. (B-D) Occurrence of the truncated 18S rRNA gene in rice. (B) Control Southern blot of *EcoR* I digested from rDNA clones with normal and truncated 18S rRNA genes (AY097331) hybridized with the

RDF2 18S probe. Vector labeled with a star. (C). Presence of the truncated 18S rRNA in ribosome preparations from leaves of *Zea mays* and *O. longistaminata* (*Oryza l.*) grown in soil fertilized (+N) or not fertilized (-N) with combined nitrogen (D). Agarose gels (upper panel) and Northern blots (lower panel).

— 5.8S rRNA M16845  
— LSU rRNA M11585  
— LSU rRNA AF363841

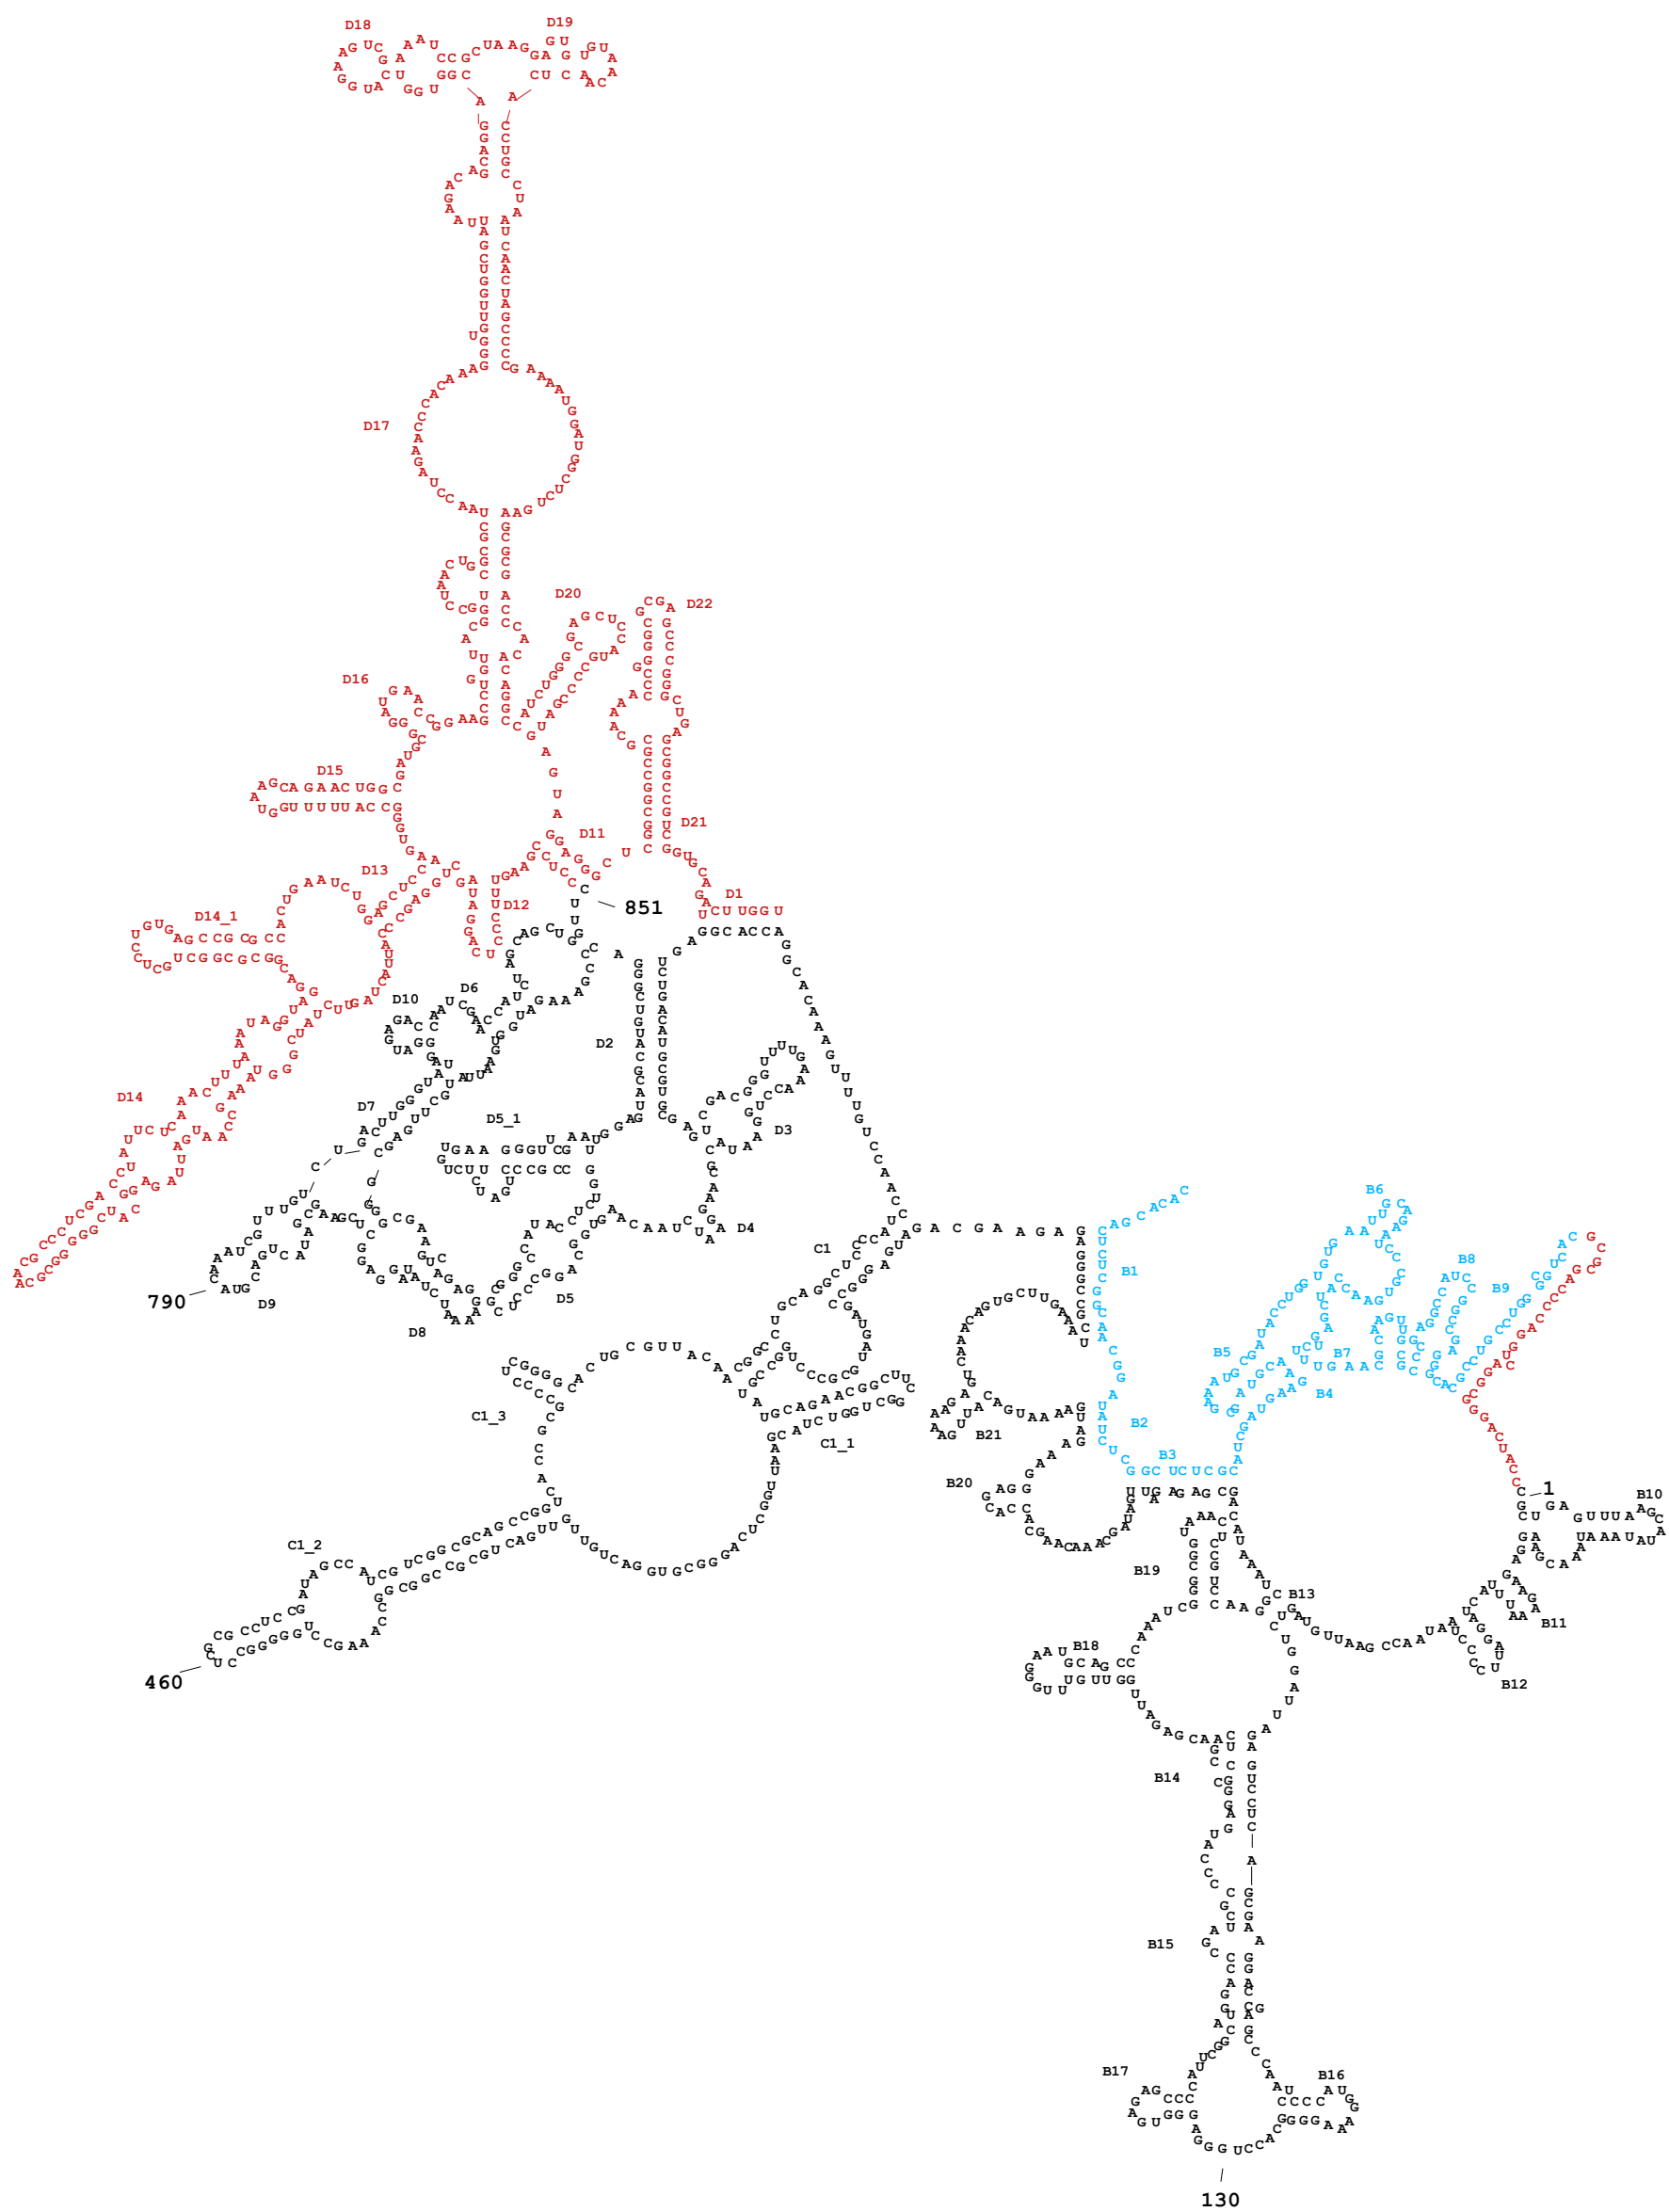

— 5.8S rRNA M16845  
— LSU rRNA M11585  
— LSU rRNA AF363902

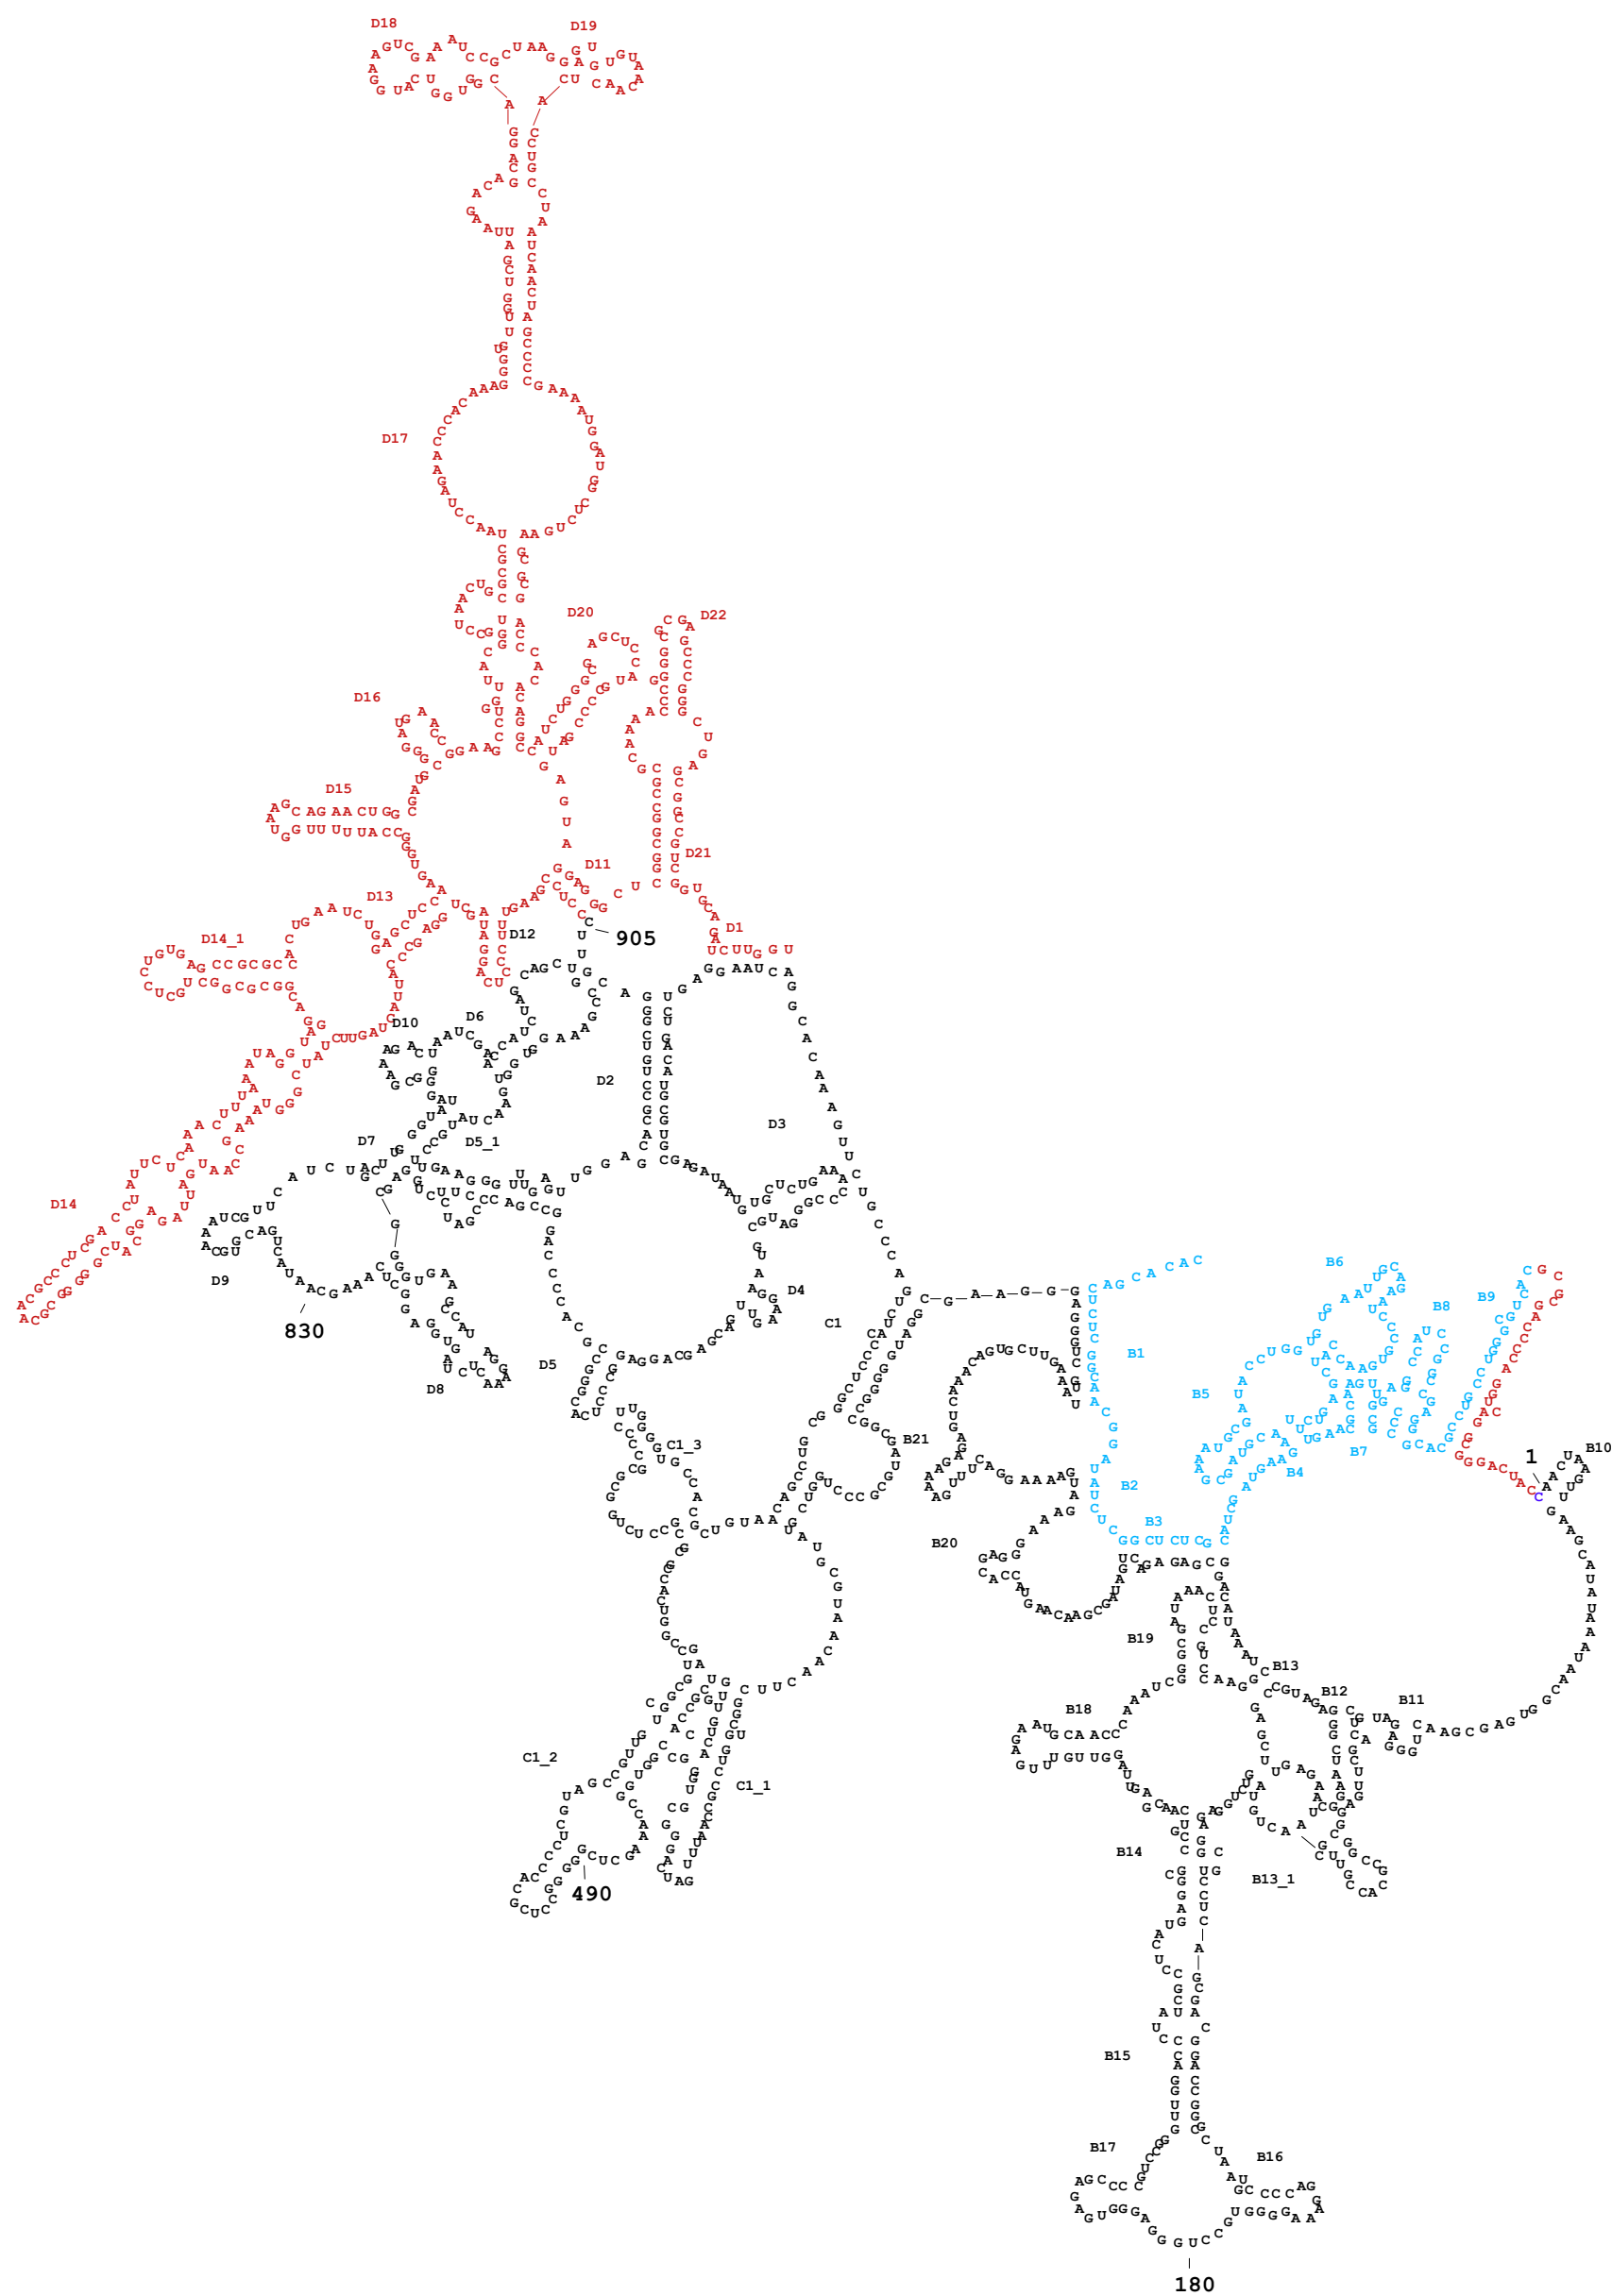

Partial LSU secondary structures from rRNA families of *Oryza* spp.

5.8S rRNA M16845  
LSU rRNA M11585  
LSU rRNA AF363882 RC3 *O. officinalis*

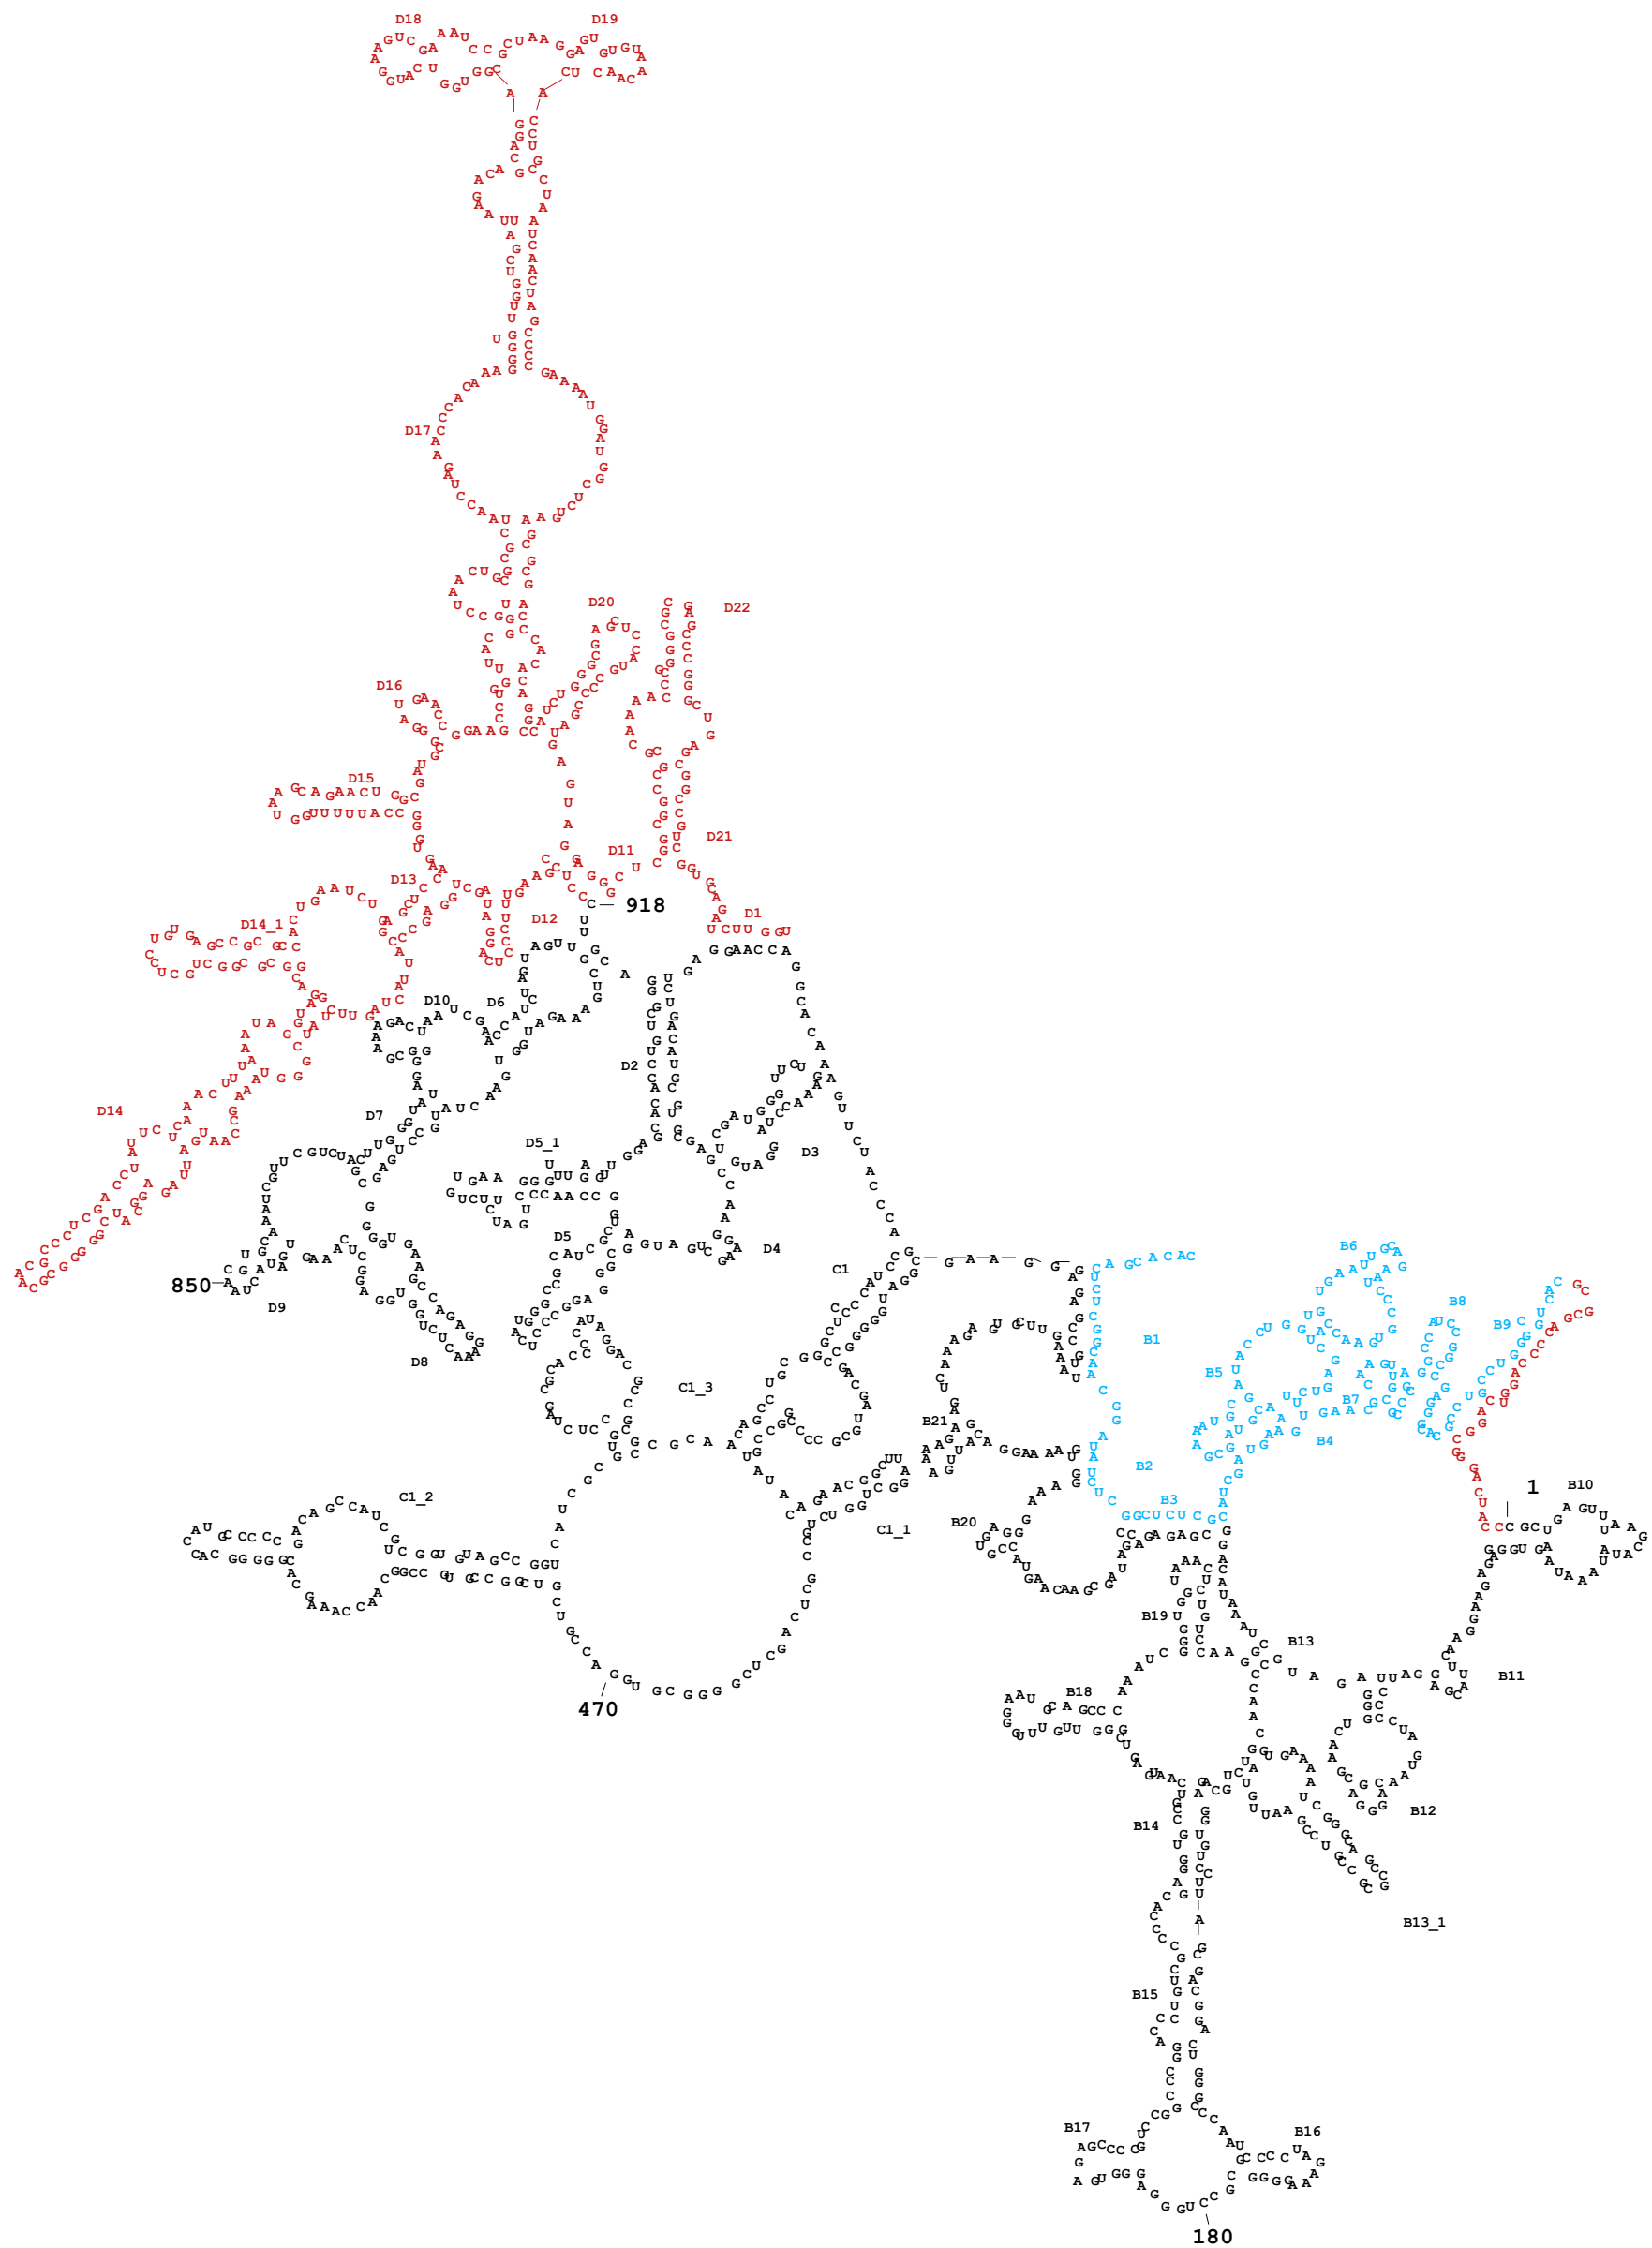

Supplement: s1 [file s1]
